# Supplementary material
Source: Springer Nature journal article supplement (https://www.springermedizin.de/resource/supplementary/12937_2011_427_MOESM1_ESM.pdf/25653086)

■ kcal/day from LCB

■ kcal/day from CNB

■ kcal/day from SSB

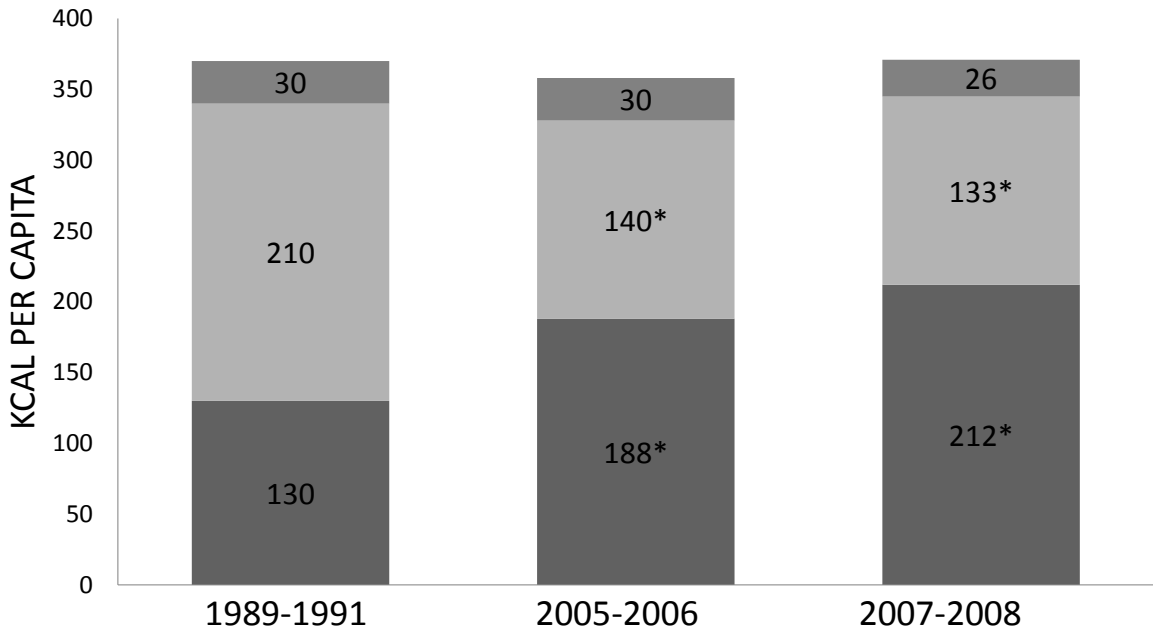

Supplement: MOESM1 [file 25653086]
